# Supplementary material
Source: PubMed Central journal article supplement (PMC9017306)
Supplement: aac.02393-21-s0001.pdf [file aac.02393-21-s0001.pdf]

**TABLE S1. Primers used for amplification and sequencing of the *SQLE* and *TERG* in this study**

| Forward primer | Forward primer sequence | Position               | Reverse primer | Reverse primer sequence | Position               |
|----------------|-------------------------|------------------------|----------------|-------------------------|------------------------|
| SQEL397S       | 5-GTTGACTGGTGGCGGTATG   | 1002–1020 <sup>#</sup> | SQEL397R       | 5'-GCTACGGAGTAAAAATGCCG | 1315–1334 <sup>#</sup> |
| TrTERG-1       | 5'-ATGGTTGTAGAGGCTCCTCC | 1–20*                  | TrTERG-1-2R    | 5'-GAGCTTCAGAGGTGAGGCCG | 456–475*               |
| TrTERG-2S      | 5'-GAACGGCAAGCTCAAGGATG | 327–346*               | TrTERG-2R      | 5'-CGGTCGCGCTTGCGGTTGTG | 727–746*               |
| TrTERG-3S      | 5'-CTACTCCGATCTCGACATGG | 663–6825*              | TrTERG-3R      | 5'-GGTCGAGTTTCTGAAGAGC  | 1054–1072*             |
| TrTERG-4S      | 5'-CCAGATATTCTCGAGGAGC  | 979–997*               | TrTERG-4R      | 5'-TTCACCGATACATCTGTGTC | 1385–1404*             |
| TrTERG-5S      | 5-GTGAAGAAAAGACAGATTAC  | 1307–1326*             | TrTERG-5R      | 5'-TCATTTCTGAGAAGCCTGCT | 1565–1584*             |

<sup>#</sup>Positions reflect those of the *T. rubrum SQLE* gene (GenBank accession no. XM\_003233797).

\*Positions reflect those of the *Trichophyton rubrum* CBS 118892 cytochrome P450 51 (TERG\_01703) mRNA gene (GenBank accession no. XM\_003236932.1).
